# Supplementary material for: Extracellular peptide Kratos restricts cell death during vascular development and stress in Arabidopsis
Source: PubMed Central journal article supplement (PMC6460963; doi:10.1093/jxb/erz021), 2019-02-07
Supplement: erz021_suppl_supplementary_table_s1.pdf [file erz021_suppl_supplementary_table_s1.pdf]

**Table S1. List of the unique peptides selected for analyses during vascular differentiation.**

| Peptide ID<br>(in this study) | Peptide sequence                  | Gene ID   | Gene annotation                                         | Reason(s) for selecting this candidate                                                                                                                                               | Vascular expression* |
|-------------------------------|-----------------------------------|-----------|---------------------------------------------------------|--------------------------------------------------------------------------------------------------------------------------------------------------------------------------------------|----------------------|
| Kratos/Peptide 1              | <b>GGIGKGGGIGGGIGKGGGIG</b>       | AT3G23450 | unknown function                                        | Significant difference in peptide analysis (Dataset S1). Abundant in induced wild-type but nearly absent in <i>MC9</i> -RNAi. The full protein seems to be a repeat of this peptide. | Yes                  |
| Peptide 2                     | <b>DSTQIHTHM</b>                  | AT5G17920 | Methione Synthesis                                      | Peptide abundant in induced <i>MC9</i> -RNAi but not found in wild-type.                                                                                                             | Yes                  |
| Peptide 3                     | <b>AVYQRSGGAPGGAGGE</b>           | AT5G28540 | BIP1, Luminal-binding protein 1, HSP70                  | Peptide abundant in induced <i>MC9</i> -RNAi but not found in wild-type.                                                                                                             | Yes                  |
| Peptide 4                     | <b>FVVTDPRDDNPVNPRPGT</b>         | AT1G04680 | Pectate Lyase, PLA1, lateral root emergence             | Peptide abundant in induced <i>MC9</i> -RNAi but not found in wild-type. The corresponding gene is involved in lateral root emergence, a process which also involves <i>MC9</i> .    | Yes                  |
| Peptide 5                     | <b>LVIIPAGVPRKPG</b>              | AT1G53240 | MITOCHONDRIAL MALATE DEHYDROGENASE 1 (mMDH1)            | Peptide abundant in induced <i>MC9</i> -RNAi but not found in wild-type.                                                                                                             | Yes                  |
| Peptide 6                     | <b>YVSIPIEGPYKPPH</b>             | AT4G13940 | HOMOLOGY-DEPENDENT GENE SILENCING 1 (HOG1)              | Peptide identified in all conditions and genotypes except in induced <i>MC9</i> -RNAi.                                                                                               | Yes                  |
| Peptide 7                     | <b>TTDFPKNPPH</b>                 | AT2G38080 | IRREGULAR XYLEM 12 (IRX12), laccase activity, Laccase-4 | Peptide abundant only under the induced condition. The full protein is known to localize to the apoplast. The peptide contains 3 prolines, which is common for signaling peptides.   | Yes                  |
| Peptide 8                     | <b>APPPMSDAHTINGKPGPL</b>         | AT5G03260 | LACCASE 11 (LAC11)                                      | Peptide abundant only under the induced condition. The full protein is known to localize to the apoplast. The peptide contains 4 prolines, which is common for signaling peptides.   | Yes                  |
| Peptide 9                     | <b>VGDVTATIVGGLNSQNGPIQK</b>      | AT3G10080 | RmlC-like cupins superfamily protein                    | Peptide abundant only under the controlled condition, mostly in the <i>MC9</i> -RNAi genotype.                                                                                       | Yes                  |
| Peptide 10                    | <b>IVNSFKTIDG</b>                 | AT1G04680 | Pectin lyase-like superfamily protein                   | Peptide abundant only in the <i>MC9</i> -RNAi genotype.                                                                                                                              | Yes                  |
| Peptide 11                    | <b>SSAGQVDGKQ</b>                 | AT1G76160 | SKU5 SIMILAR 5 (sks5)                                   | Significant difference in peptide analysis (Dataset S1). Peptide identified in all conditions and genotypes except in induced <i>MC9</i> -RNAi.                                      | Yes                  |
| Peptide 12                    | <b>RYSNSAGGVSGPIPGPT</b>          | AT1G76160 | SKU5 SIMILAR 5 (sks5)                                   | Significant difference in peptide analysis (Dataset S1). Abundant in induced wild-type but nearly absent in <i>MC9</i> -RNAi.                                                        | Yes                  |
| Peptide 13                    | <b>FETEPIGKNGKGD</b>              | AT2G05710 | ACONITASE 3 (ACO3)                                      | Significant difference in peptide analysis (Dataset S1). Abundant in induced wild-type but nearly absent in <i>MC9</i> -RNAi.                                                        | Yes                  |
| Bia/Peptide 14                | <b>EKTAKKAAQAAAAASSGGGGKGNK</b>   | AT3G24100 | Uncharacterised protein family SERF                     | Peptide abundant in induced <i>MC9</i> -RNAi but not found in wild-type.                                                                                                             | no data available    |
| Peptide 15                    | <b>AKADVEPKAAEAETKPSQV</b>        | AT3G56240 | COPPER CHAPERONE (CCH)                                  | Peptide abundant only in the induced condition. Potential <i>MC9</i> substrate                                                                                                       | Yes                  |
| Peptide 16                    | <b>NAIGGRKGRIVVTPANDDPVNPRPGT</b> | AT3G27400 | Pectin lyase-like superfamily protein                   | Peptide abundant in all conditions for all genotypes, therefore representing a potential control peptide.                                                                            | Yes                  |

\* We considered as "vascular expression" the detection of transcripts in tracheary elements (TEs) or in any cell neighboring TEs (i.e. pro-cambium, xylem-pole pericycle) in the Arabidopsis eFP Browser (Winter et al. 2007. *PLoS One* 2(8): e718) "Root" dataset, consisting of transcriptomics data from different root cell types (Brady et al. 2007. *Science* 318(5851): 801-806; Cartwright et al. 2009. *Bioinformatics* 25(19): 2581-2587).
